# Supplementary material for: Efficacy of Vonoprazan for Gastroesophageal Reflux Symptoms in Patients with Proton Pump Inhibitor-resistant Non-erosive Reflux Disease
Source: PubMed Central journal article supplement — Intern Med. 2018 Mar 30;57(17):2443–50. doi: 10.2169/internalmedicine.0492-17 (PMC6172555; doi:10.2169/internalmedicine.0492-17), 2018-03-30
Supplement: 1349-7235-57-2443-s002.pdf [file 1349-7235-57-2443-s002.pdf]

**Supplementary material 2. Self-reported relief of acid reflux symptoms after therapy**

**change from a PPI to vonoprazan according to *H.pylori* infection status**

| <b>Outcome</b>                                                    | <b>No. of patients<br/>(%)</b> | <b>Odds ratio (95% CI)</b> | <b>P value</b> |
|-------------------------------------------------------------------|--------------------------------|----------------------------|----------------|
| <b><i>H.pylori</i> persistent infected patients (N = 13)</b>      |                                |                            |                |
| Self-reported relief of symptoms                                  |                                |                            |                |
| Improvement                                                       | 8 (61.5)                       | 8.0 (1.1–356)              | <b>0.039</b>   |
| No change                                                         | 4 (30.8)                       |                            |                |
| Exacerbation                                                      | 1(7.7)                         |                            |                |
| <b><i>H.pylori</i> eradicated or uninfected patients (N = 13)</b> |                                |                            |                |
| Self-reported relief of symptoms                                  |                                |                            |                |
| Improvement                                                       | 10 (76.9)                      | 10 (1.4–434)               | <b>0.012</b>   |
| No change                                                         | 2 (15.4)                       |                            |                |
| Exacerbation                                                      | 1 (7.7)                        |                            |                |

Abbreviations: *H.pylori*, *Helicobacter pylori*; CI, confidence interval; PPI, proton pump inhibitor; NA, not applicable.

Bold indicates statistical significance (P < 0.05).
